# Supplementary material for: Exploratory characterization of dynamic soluble programmed death-ligand 1 trajectories and their association with mortality in critical coronavirus disease 2019
Source: J Intensive Care. 2026 Jan 5;14:13. doi: 10.1186/s40560-025-00846-3 (PMC12870821; doi:10.1186/s40560-025-00846-3)
Supplement: Supplementary file 2 — Additional file 2. [file 40560_2025_846_MOESM2_ESM.xlsx]

## Sheet: シート1 - Univariate Cox Full Resu
Univariate Cox Full Results
variable	coef	se	HR	HR_lower95	HR_upper95	p_value	q_value
Body Mass Index	-0.149627	0.362957	0.861029	0.422729	1.75377	0.68016	0.80224
COVID-19 antigen	0.730869	0.321994	2.07689	1.10491	3.90391	0.0232183	0.106804
Total protein	-0.529464	0.321844	0.588921	0.313399	1.10666	0.09995	0.229885
Albumin	-0.287661	0.382829	0.750016	0.35416	1.58833	0.452408	0.641166
Blood Urea Nitrogen	0.553489	0.254412	1.73931	1.05637	2.86376	0.0295884	0.113422
Creatinine	0.739878	0.24069	2.09568	1.30751	3.35895	0.00211217	0.0365603
eGFR	-0.730286	0.383241	0.481771	0.22731	1.02109	0.0567083	0.163036
Sodium	-0.0897589	0.352764	0.914152	0.457867	1.82514	0.799152	0.854907
Calcium	-0.202387	0.270254	0.816779	0.480906	1.38723	0.453931	0.641166
AST	0.42082	0.191611	1.52321	1.0463	2.2175	0.0280762	0.113422
ALT	0.401562	0.222546	1.49416	0.965965	2.31116	0.0711687	0.178993
LDH	-0.119442	0.340387	0.887415	0.45539	1.7293	0.725663	0.834512
Total Bilirubin	0.789779	0.285679	2.20291	1.25841	3.85631	0.00569981	0.0436985
Amylase	0.68387	0.237437	1.98153	1.2442	3.15581	0.00397395	0.0365603
C-reactive protein	-0.455494	0.343973	0.634135	0.323136	1.24445	0.185432	0.328071
White Blood Cell	-0.558351	0.434973	0.572152	0.243924	1.34205	0.199266	0.33949
Red Blood Cell	-0.578763	0.323868	0.560591	0.297143	1.05762	0.0739318	0.178993
Hemoglobin	-0.452613	0.308589	0.635964	0.347341	1.16442	0.142453	0.284906
Platelet	-1.11084	0.609342	0.329281	0.0997434	1.08705	0.0683	0.178993
Neutrophil	-0.556636	0.286854	0.573134	0.326649	1.00561	0.0523208	0.16045
Lymphocyte	0.442702	0.282543	1.55691	0.894865	2.70875	0.11715	0.244951
Monocyte	0.162191	0.309839	1.17608	0.640764	2.15863	0.600648	0.767495
Eosinophil	-1.3705	1.85479	0.253979	0.00669838	9.62996	0.459967	0.641166
Basophil	0.399935	0.251462	1.49173	0.911257	2.44196	0.111736	0.244754
APTT	0.0325856	0.293488	1.03312	0.581206	1.83643	0.911594	0.911594
Prothrombin Time	-0.291676	0.626231	0.747011	0.218911	2.54909	0.641384	0.776413
PT-INR	-0.296807	0.62838	0.743187	0.216875	2.54675	0.636686	0.776413
Fibrinogen	-0.385338	0.345006	0.68022	0.345919	1.3376	0.264036	0.404855
D-dimer	0.375607	0.18862	1.45587	1.00593	2.10708	0.0464435	0.1526
pH	-0.919889	0.390704	0.398563	0.185321	0.857178	0.0185506	0.0948141
PaCO2	0.468603	0.353131	1.59776	0.799689	3.19229	0.18451	0.328071
PaO2	-0.109307	0.341687	0.896455	0.458858	1.75137	0.749041	0.840387
Bicarbonate	-0.334184	0.273356	0.715922	0.418967	1.22335	0.22151	0.360164
Base Excess	-0.564598	0.272114	0.568589	0.333557	0.969229	0.0379996	0.13446
Anion Gap	0.145612	0.250369	1.15675	0.708142	1.88954	0.560843	0.737108
Ionized calcium	-0.335989	0.278145	0.714631	0.414305	1.23266	0.22706	0.360164
Blood Glucose	0.0823021	0.307599	1.08578	0.594169	1.98416	0.789036	0.854907
Lactate	0.988424	0.326765	2.687	1.41618	5.09818	0.00248734	0.0365603
Osmolality	-0.205558	0.306587	0.814193	0.446432	1.48491	0.502557	0.67993
NLR	-0.0660445	0.413801	0.936089	0.41599	2.10645	0.873192	0.892597
PD-L1(day1)	0.283205	0.204622	1.32738	0.888826	1.98231	0.166347	0.318831
PD-L1(day5)	0.550436	0.222083	1.73401	1.12204	2.67974	0.0131932	0.0866984
PD-L1(day7)	0.735888	0.252481	2.08733	1.27255	3.4238	0.0035612	0.0365603
Respiratory Rate	-1.01528	0.426009	0.362299	0.157196	0.835015	0.0171608	0.0948141
SOFA score	0.741957	0.223642	2.10004	1.35475	3.25533	0.00090789	0.0365603
P/F ratio	-0.0840531	0.374461	0.919382	0.441315	1.91533	0.822396	0.859778
